# Supplementary material for: Nickel phosphonate-derived Ni2P@N-doped carbon co-catalyst with built-in electron-bridge for boosting photocatalytic hydrogen evolution
Source: Royal Society of Chemistry journal article supplement (doi:10.1039/d2qi00064d), 2022-01-01
Supplement: d2qi00064d1.pdf [file d2qi00064d1.pdf]

## Supporting Information

### **Nickel phosphonate-derived Ni<sub>2</sub>P@N-doped carbon co-catalyst with built-in electron-bridge for boosting the photocatalytic hydrogen evolution**

Li-Jiao Gao<sup>†</sup>, Xin-Lian Song<sup>†</sup>, Jin-Tao Ren, Zhong-Yong Yuan<sup>\*</sup>

*Key Laboratory of Advanced Energy Materials Chemistry (Ministry of Education),  
School of Materials Science and Engineering, Nankai University, Tianjin 300350, China*

<sup>\*</sup> Corresponding author. *E-mail address:* [zyyuan@nankai.edu.cn](mailto:zyyuan@nankai.edu.cn)

<sup>†</sup> These two authors contribute equally.

## 1. Experimental section

### 1.1 Materials

All the chemical reagents of analytical grade were used as received. Cadmium acetate ( $\text{Cd}(\text{Ac})_2 \cdot 2\text{H}_2\text{O}$ ,  $\geq 99.5\%$ ) and Zinc acetate ( $\text{Zn}(\text{Ac})_2 \cdot 2\text{H}_2\text{O}$ ,  $\geq 99.5\%$ ) were purchased from Shengfeier Biotechnology Service Center, Tianjin. 1-hydroxy ethylidene-1,1-diphosphonic acid (HEDP,  $\geq 99.5\%$ ) was purchased from Tianjin Hongfengweili Technology Development Co., Ltd. Nickel nitrate ( $\text{Ni}(\text{NO}_3)_2$ ,  $\geq 98.0\%$ ), sodium sulfide nonahydrate ( $\text{Na}_2\text{S} \cdot 9\text{H}_2\text{O}$ , 98.0%) and melamine ( $\text{C}_3\text{H}_6\text{N}_6$ ,  $\geq 99.0\%$ ) were purchased from Tianjin Damao Chemical Reagent Works (China). Sodium hypophosphite ( $\text{NaH}_2\text{PO}_2$ ,  $\geq 99.0\%$ ) was purchased from Shanghai Aladdin Biochemical Technology Co., Ltd. Nonionic triblock copolymer F127 ( $\text{EO}_{106}\text{PO}_{70}\text{EO}_{106}$ ) were purchased from Beijing Fenglijingqiu Pharmaceutical Co., Ltd. Sodium sulfite anhydrous ( $\text{Na}_2\text{SO}_3$ , 97.0%) was from Tianjin Jiangtian Chemical Technology Co., Ltd.

### 1.2 Apparent quantum efficiency (AQE) calculation

The power of light after the bandpass filter (420 nm) and the irradiation area were measured to be  $25.22 \text{ mW} \cdot \text{cm}^{-2}$  and  $63.62 \text{ cm}^2$ . The apparent quantum efficiency (AQE) was defined by the following equation:

$$\text{AQE}(\%) = \frac{\text{the number of hydrogen molecules} \times 2}{\text{the number of incident photons}} \times 100\%$$

## 2. Supplementary Figures

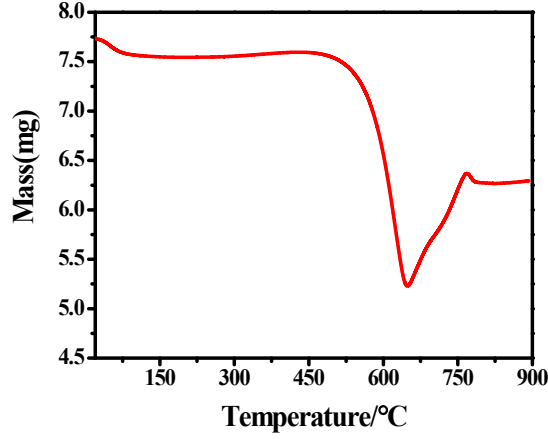

**Figure S1.** The TG curve of Ni<sub>2</sub>P@CN.

The mass ration of Ni<sub>2</sub>P to CN was calculated according to the equations:

$$m_{\text{Ni}_2\text{P}} = \frac{3m_{\text{Ni}_3(\text{PO}_4)_2}}{2M_{\text{Ni}_3(\text{PO}_4)_2}} M_{\text{Ni}_2\text{P}} \quad (1)$$

$$\frac{m_{\text{Ni}_2\text{P}}}{m_{\text{CN}}} = \frac{m_{\text{Ni}_2\text{P}}}{m_0 - m_{\text{Ni}_2\text{P}}} \quad (2)$$

In the two equations,  $m_{\text{Ni}_3(\text{PO}_4)_2}$  is the remaining mass at the end of thermogravimetric curve (**Figure S1**), 6.294 mg.  $m_0$  is the initial mass of Ni<sub>2</sub>P@CN, 7.742 mg. The  $M_{\text{Ni}_3(\text{PO}_4)_2}$  and  $M_{\text{Ni}_2\text{P}}$  refer to the molar mass of Ni<sub>3</sub>(PO<sub>4</sub>)<sub>2</sub> and Ni<sub>2</sub>P, 366.02 g/mol and 148.35 g/mol, respectively. The  $m_{\text{Ni}_2\text{P}}$  and  $m_{\text{CN}}$  represent the mass of Ni<sub>2</sub>P and CN in Ni<sub>2</sub>P@CN, respectively.

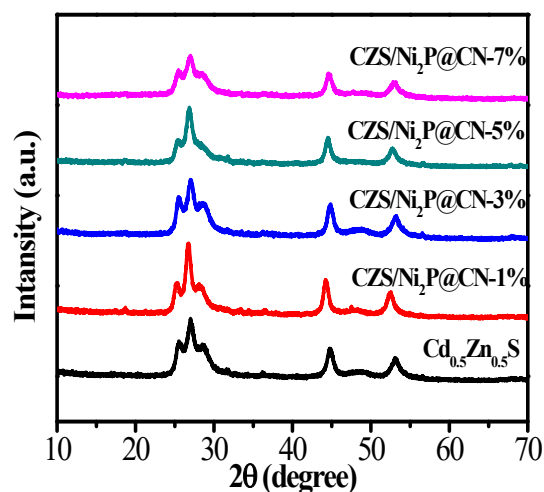

**Figure S2.** XRD patterns of CZS/Ni<sub>2</sub>P@CN-*x*% composites with various cocatalyst contents.

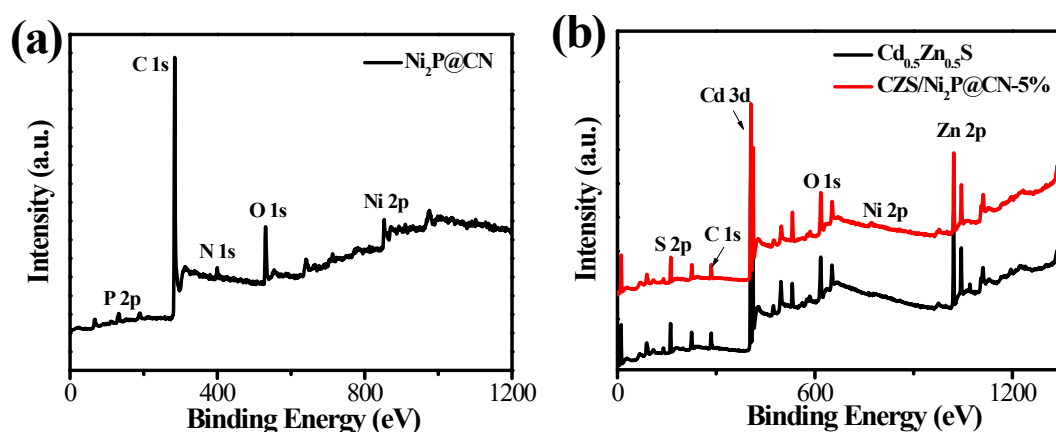

**Figure S3.** Survey XPS spectra of (a) Ni<sub>2</sub>P@CN, (b) CZS/Ni<sub>2</sub>P@CN-5% and Cd<sub>0.5</sub>Zn<sub>0.5</sub>S.

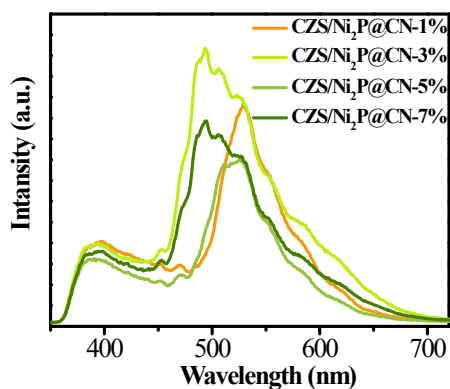

**Figure S4.** PL spectra of CZS/Ni<sub>2</sub>P@CN-*x* (*x* represents 1%, 3%, 5% and 7%)

### 3. Supplementary Table

**Table S1.** Surfaces area and pore structures of the prepared samples.

| Sample                                   | $S_{\text{BET}}/\text{m}^2 \text{ g}^{-1}$ | Pore volume/ $\text{cm}^3 \text{ g}^{-1}$ |
|------------------------------------------|--------------------------------------------|-------------------------------------------|
| $\text{Cd}_{0.5}\text{Zn}_{0.5}\text{S}$ | 52                                         | 0.22                                      |
| CZS/ $\text{Ni}_2\text{P}$ @CN-5%        | 75                                         | 0.21                                      |
| CZS/ $\text{Ni}_2\text{P}$               | 70                                         | 0.38                                      |
| CZS/ $\text{Ni}_2\text{P}$ /CN           | 51                                         | 0.26                                      |

**Table S2.** The molar ratio of Cd(Zn)/Ni and  $\text{H}_2$  production of the samples.

| Samples                           | Molar ratio of Cd(Zn)/Ni | $\text{H}_2$ production ( $\text{mmol h}^{-1}\text{g}^{-1}$ ) |
|-----------------------------------|--------------------------|---------------------------------------------------------------|
| CZS                               | —                        | 12.35                                                         |
| CZS/ $\text{Ni}_2\text{P}$ @CN-1% | 1:0.016                  | 12.57                                                         |
| CZS/ $\text{Ni}_2\text{P}$ @CN-3% | 1:0.048                  | 21.42                                                         |
| CZS/ $\text{Ni}_2\text{P}$ @CN-5% | 1:0.080                  | 28.52                                                         |
| CZS/ $\text{Ni}_2\text{P}$ @CN-7% | 1:0.112                  | 22.06                                                         |
